# Supplementary material for: Electrical mobilities of multiply charged ionic-liquid nanodrops in air and carbon dioxide over a wide temperature range: influence of ion-induced dipole interactions
Source: Royal Society of Chemistry journal article supplement (doi:10.1039/c4cp02850c), 2014-01-01
Supplement: c4cp02850c1.pdf [file c4cp02850c1.pdf]

**Physical Chemistry Chemical Physics**  
Electronic Supplementary Information for:

**Electrical Mobilities of Multiply-Charged Ionic-Liquid Nanodrops in Air  
and Carbon Dioxide Over a Wide Temperature Range: Influence of  
Ion-Induced Dipole Interactions**

Juan Fernández-García, Juan Fernández de la Mora  
*Mechanical Engineering and Materials Science Department, Yale University, New Haven, CT*

New Haven, CT  
August 1, 2014

*Address correspondence to:*  
Juan Fernández García  
9 Hillhouse Ave, Mason Lab Room M7  
New Haven, CT 06511  
Phone: 203-432-4248  
*e-mail:* [juan.fernandezgarcia@yale.edu](mailto:juan.fernandezgarcia@yale.edu)

## Appendix A Determination of the Tait equation parameters $K_o$ and $k_s$ for EMI-BF<sub>4</sub>

Our mass-based determination of nanodrop diameters relies on solving the Tait equation for each of the IL nanodrops present in our mass–mobility spectra. This, in turn, requires knowledge of the isothermal compressibility coefficients  $K_o$  and  $k_s$  for EMI-BF<sub>4</sub> at the various temperatures at which measurements were performed. The latter were obtained, in the present work, by fitting  $(\rho, p, T)$  data for EMI-BF<sub>4</sub> available in the literature to the Tait equation which, for convenience, is rewritten below:

$$\frac{\rho_o}{\rho} = 1 - \frac{\Delta p}{K_o + k_s \Delta p} . \quad (\text{A1})$$

Table A1 includes the experimental  $\rho$  vs.  $p$  data for EMI-BF<sub>4</sub> reported by Taguchi and coworkers<sup>1</sup> for the set of four temperatures  $T = 313.2, 332.6, 352.7$ , and  $372.8$  K, corresponding roughly to the four higher temperatures investigated in our IMS–MS measurements (that is 40, 60, 80, and 100 °C).

**Table A1.** EMI-BF<sub>4</sub> density  $\rho$  vs. pressure  $p$  and temperature  $T$ , after Taguchi and coworkers.<sup>1</sup>

| $p$ [MPa] | $\rho(p, T)$ [kg m <sup>-3</sup> ] |              |              |              |
|-----------|------------------------------------|--------------|--------------|--------------|
|           | $T$ [K (°C)]                       |              |              |              |
|           | 313.2 (40)                         | 332.6 (59.5) | 352.7 (79.5) | 372.8 (99.5) |
| 0.1       | 1269                               | 1254         | 1239         | 1225         |
| 10        | 1274                               | 1259         | 1244         | 1230         |
| 20        | 1278                               | 1264         | 1249         | 1235         |
| 30        | 1282                               | 1268         | 1254         | 1240         |
| 40        | 1287                               | 1273         | 1259         | 1245         |
| 50        | 1291                               | 1277         | 1263         | 1250         |
| 60        | 1295                               | 1281         | 1267         | 1254         |
| 70        | 1299                               | 1285         | 1272         | 1258         |
| 80        | 1302                               | 1289         | 1276         | 1263         |
| 90        | 1306                               | 1293         | 1280         | 1267         |
| 100       | 1310                               | 1297         | 1284         | 1271         |
| 110       | 1313                               | 1300         | 1287         | 1275         |
| 120       | 1317                               | 1304         | 1291         | 1279         |
| 130       | 1320                               | 1307         | 1295         | 1282         |
| 140       | 1323                               | 1311         | 1298         | 1286         |
| 150       | 1327                               | 1314         | 1302         | 1290         |
| 160       | 1330                               | 1317         | 1305         | 1293         |
| 170       | 1333                               | 1321         | 1309         | 1297         |
| 180       | 1336                               | 1324         | 1312         | 1300         |
| 190       | 1339                               | 1327         | 1315         | 1303         |
| 200       | 1342                               | 1330         | 1318         | 1307         |

These data are plotted in Figure A1, together with the best nonlinear least-squares fit of each data set to a model equation of the form (A1). For the purpose of performing nonlinear regression, the variable  $\Delta p$  was defined as  $\Delta p = p - p_0$ , where  $p_0$  is the lowest pressure for which density data is available at a

given temperature (which, in this case, is precisely  $p_0 = 0.1 \text{ MPa} \approx 1 \text{ atm}$  for all temperatures considered), while  $\rho_0$  was taken as the density measured at this lowest pressure for each of the temperatures under consideration, that is,  $\rho_0 = \rho(p_0, T)$ .

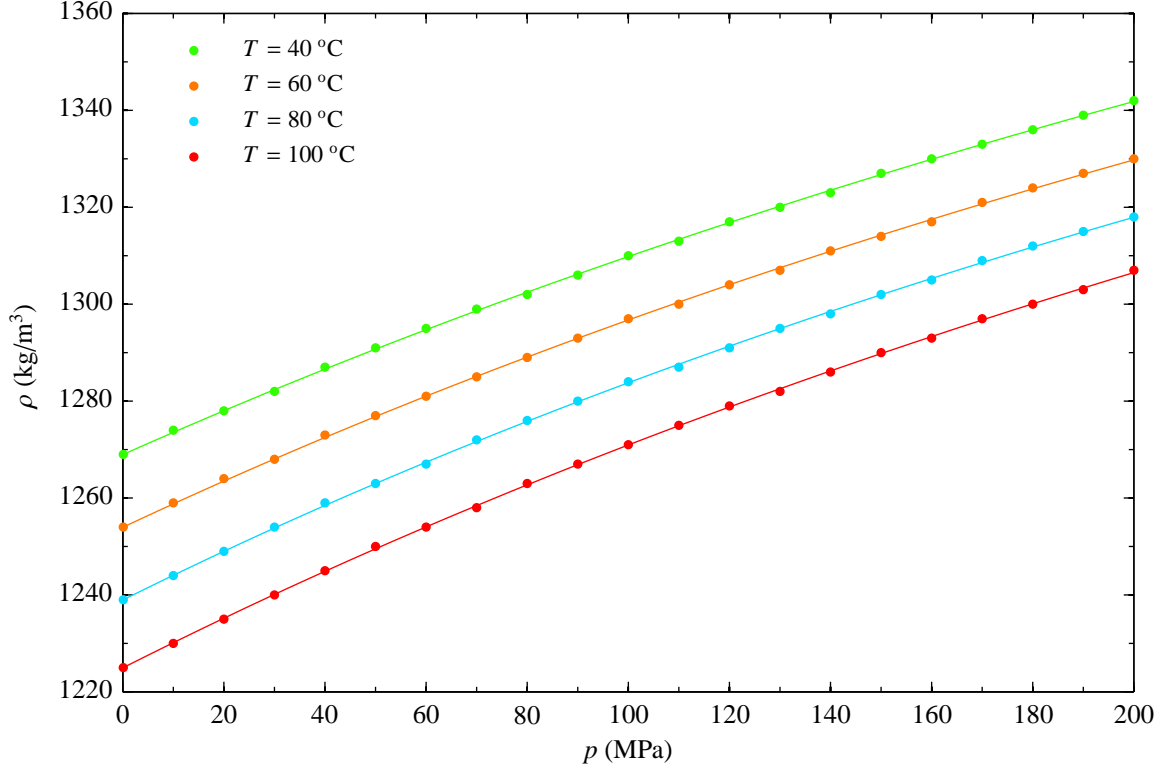

**Figure A1.** Plots of the experimental EMI-BF<sub>4</sub> density  $\rho$  versus pressure  $p$  data of Taguchi and coworkers<sup>1</sup> for the set of temperatures 40, 60, 80, and 100 °C (circles), and best nonlinear least-squares fit (solid lines) of each curve to the Tait equation (A1)

Plots of the best-fit values of  $K_0$  and  $k_s$  as a function of  $T$  are shown in Figure A2, and are also reported in Table A2, together with their standard uncertainties and the coefficient of determination of the corresponding nonlinear fits. Also included in Figure A2 and Table A2 are the values of  $K_0$  and  $k_s$  resulting from linear extrapolation of the best-fit  $K_0$  and  $k_s$  vs.  $T$  curves to  $T = 20^\circ\text{C}$ . Due to the absence of experimental  $\rho(p)$  data for  $T = 20^\circ\text{C}$  in Taguchi's work, these extrapolated values have been the ones adopted in the present work for solving the Tait equation at this temperature. Similarly, the value of 4.40 determined for  $k_s$  at 100 °C falls off of the nearly-linear trend set by the three lower-temperature data points as well as by data for higher temperatures ( $k_s = 4.62/4.59$  for  $T = 120/140^\circ\text{C}$ , not shown in Figure A2). Therefore, the value  $k_s = 4.70$ , resulting from extrapolating the data for 60 and 80 °C to 100 °C (also indicated in Figure A2 and Table A2), has been used instead. This extrapolation may appear objectionable. However, as previously shown<sup>2</sup> (see Figure D1 and Table D1 of the Electronic Supplementary Material there), and for the moderately low compressibilities dealt with here ( $K_0 > 2 \text{ GPa}$ ), errors of up to 10% in  $K_0$ , and of even up to 100% in  $k_s$ , result in negligible errors ( $\sim 1\%$ ) in the determined values of the parameters  $d_g$ ,  $\beta$ , and  $\xi$ . Therefore, and despite the lack of a more proper justification for the choice of these extrapolated values, we

can nonetheless be confident that the uncertainties incurred in their choice do not affect the results of our analysis in any significant fashion. This is particularly true in the case of the datum for  $k_s$  at 100 °C, for which using the anomalous value of 4.40 obtained from nonlinear regression, instead of the extrapolated value of 4.70, leads to a change of only  $\sim 0.1\%$  in the values found for  $d_g$ ,  $\beta$ , and  $\xi$ .

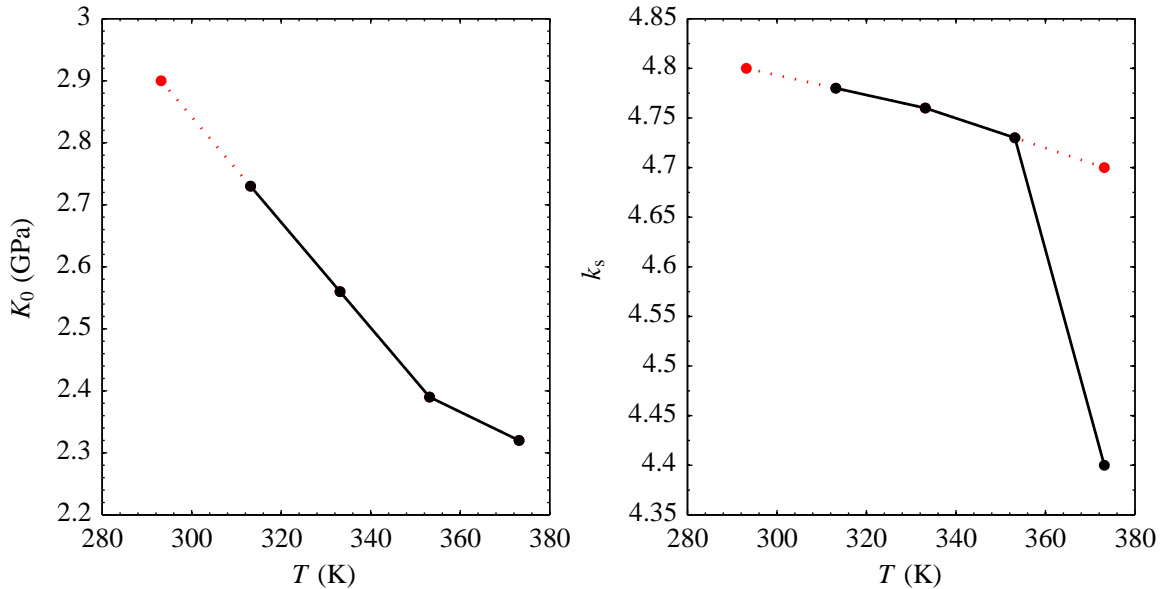

**Figure A2.** Plots of the temperature-dependence of the Tait equation parameters  $K_0$  (left) and  $k_s$  (right) for EMI-BF<sub>4</sub>, determined by nonlinear least-squares regression of the  $(\rho, p, T)$  data reported by Taguchi<sup>1</sup> to the Tait equation (A1). The red dots for  $K_0$  and  $k_s$  at 20 °C, and for  $k_s$  at 100 °C, result from linear extrapolation of the remaining data.

**Table A2.** Values of the isothermal compressibility coefficients  $K_0$  and  $k_s$  for EMI-BF<sub>4</sub>, determined by nonlinear least-squares regression of the  $(\rho, p, T)$  data reported by Taguchi<sup>1</sup> to the Tait equation (A1), for the set of temperatures 20, 40, 60, 80, and 100 °C, together with their standard uncertainties  $\pm K_0$  and  $\pm k_s$ , and the coefficients of determination  $R^2$  of the best nonlinear fits. The values in brackets (in red) result from linear extrapolation of the remaining data.

| $T$ (°C) | $K_0$ (GPa) | $k_s$       | $\Delta K_0$ (GPa) | $\Delta k_s$ | $R^2$   |
|----------|-------------|-------------|--------------------|--------------|---------|
| 20       | [2.90]      | [4.80]      | -                  | -            | -       |
| 40       | 2.73        | 4.78        | 0.017              | 0.112        | 0.99984 |
| 60       | 2.56        | 4.76        | 0.015              | 0.101        | 0.99986 |
| 80       | 2.39        | 4.73        | 0.014              | 0.093        | 0.99986 |
| 100      | 2.32        | 4.40 [4.70] | 0.012              | 0.081        | 0.99988 |

## Appendix B On the temperature-independent reduced mobility assumption for THA<sup>+</sup>

The assumption made in the article about the constant reduced mobility of the tetraheptylammonium (THA<sup>+</sup>) cation with temperature (in air) was based on the work published back in 2005 by Viidanoja and coworkers.<sup>3</sup> These authors performed drift-tube-based IMS–MS measurements, in N<sub>2</sub>, of a series of

tetraalkylammonium cations, ranging in alkyl-chain length from *ethyl*- to *dodecyl*-, within the temperature range 25–90 °C. Their IMS–MS spectra included, in addition, the protonated 2,6-di-*tert*-butyl pyridine ion (2,6-DtBP<sup>+</sup>), for which a constant reduced mobility versus temperature in air had been previously reported by Eiceman and coworkers<sup>4</sup> over the range 37–250 °C. Viidanoja found the reduced mobilities of all the above tetraalkylammonium ions to be roughly temperature-independent, showing only slight, non-systematic variations with temperature, which they attributed chiefly to instrumental uncertainties.

In order to independently verify the above observation, we decided to carry out, in our laboratory, a set of DMA-based IMS–MS measurements for the same series of tetraalkylammonium cations as those studied by Viidanoja and including as well 2,6-DtBP<sup>+</sup>, using dry air as the drift gas and covering the temperature range 20–100 °C in 10 °C steps. Specifically, we performed three measurements at each of those temperatures and, for each of the tetraalkylammonium ions TC<sub>*i*</sub>A<sup>+</sup> (where *i* represents the alkyl-chain length, e.g., TC<sub>*i*</sub>A<sup>+</sup> = THA<sup>+</sup>) included in the corresponding IMS–MS spectra, studied the temperature dependence of the ratio  $V_{\text{DMA}}(2,6\text{-DtBP}^+)/V_{\text{DMA}}(\text{TC}_i\text{A}^+) = Z_0(\text{TC}_i\text{A}^+)/Z_0(2,6\text{-DtBP}^+)$ , averaging over the three measurements performed at every temperature.

The results of those measurements for the particular case of THA<sup>+</sup> are included in Figure B3, showing only a slight but, in this case, clearly systematic (i.e., monotonic) decrease of THA<sup>+</sup>'s reduced mobility with temperature, relative to that of 2,6-DtBP<sup>+</sup>. In particular, if  $Z_0$  was indeed temperature-independent for 2,6-DtBP<sup>+</sup> in air, then, as shown in Figure B3, the reduced mobility of THA<sup>+</sup> in this gas would decay in a factor  $\sim 1 - 0.5775/0.5925 \sim 2.5\%$  upon increasing the temperature from 20 to 100 °C. This, in turn, and as already mentioned in the article, would lead to a corresponding increase of  $\sim 2.5\%$  in the value of the drag-enhancement factor determined from our EMI-BF<sub>4</sub> nanodrop measurements at 100 °C, such that the effective variation of  $\langle \xi \rangle$  over the whole range of temperatures covered in our experiments would decrease from the original  $\sim 5\%$  (based on the temperature-independent THA<sup>+</sup> reduced-mobility assumption) to only  $\sim 2\%$  (based on the results of Figure B3).

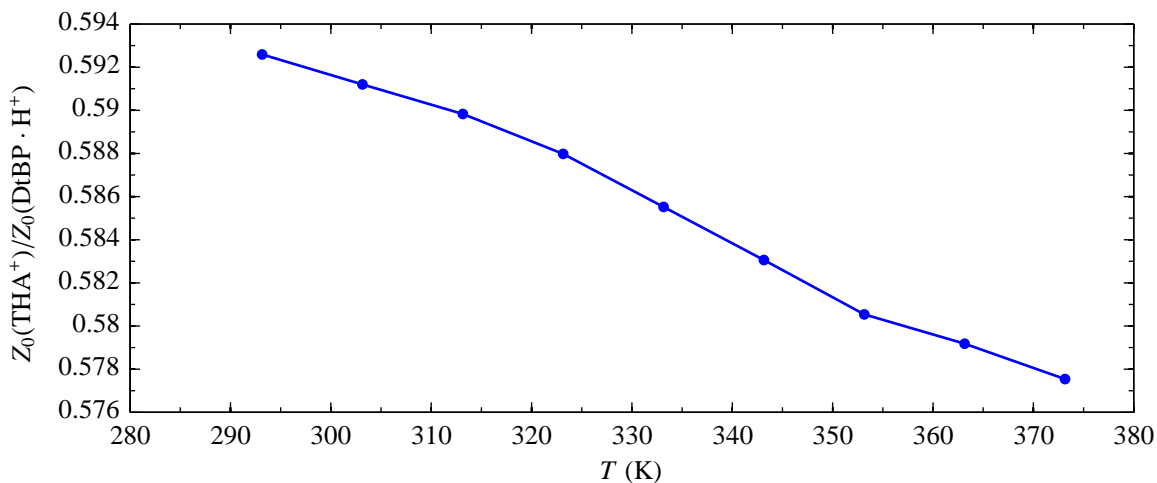

**Figure B3.** Ratio between the measured reduced mobilities of THA<sup>+</sup> and 2,6-DtBP<sup>+</sup> in dry-grade air, as a function of temperature, in the range  $T = 20\text{--}100$  °C.

### Appendix C Plots of $Z_0/Z_{0,SM,mod}$ vs. $\varepsilon^*$ for EMI-BF<sub>4</sub> + THABr spectra

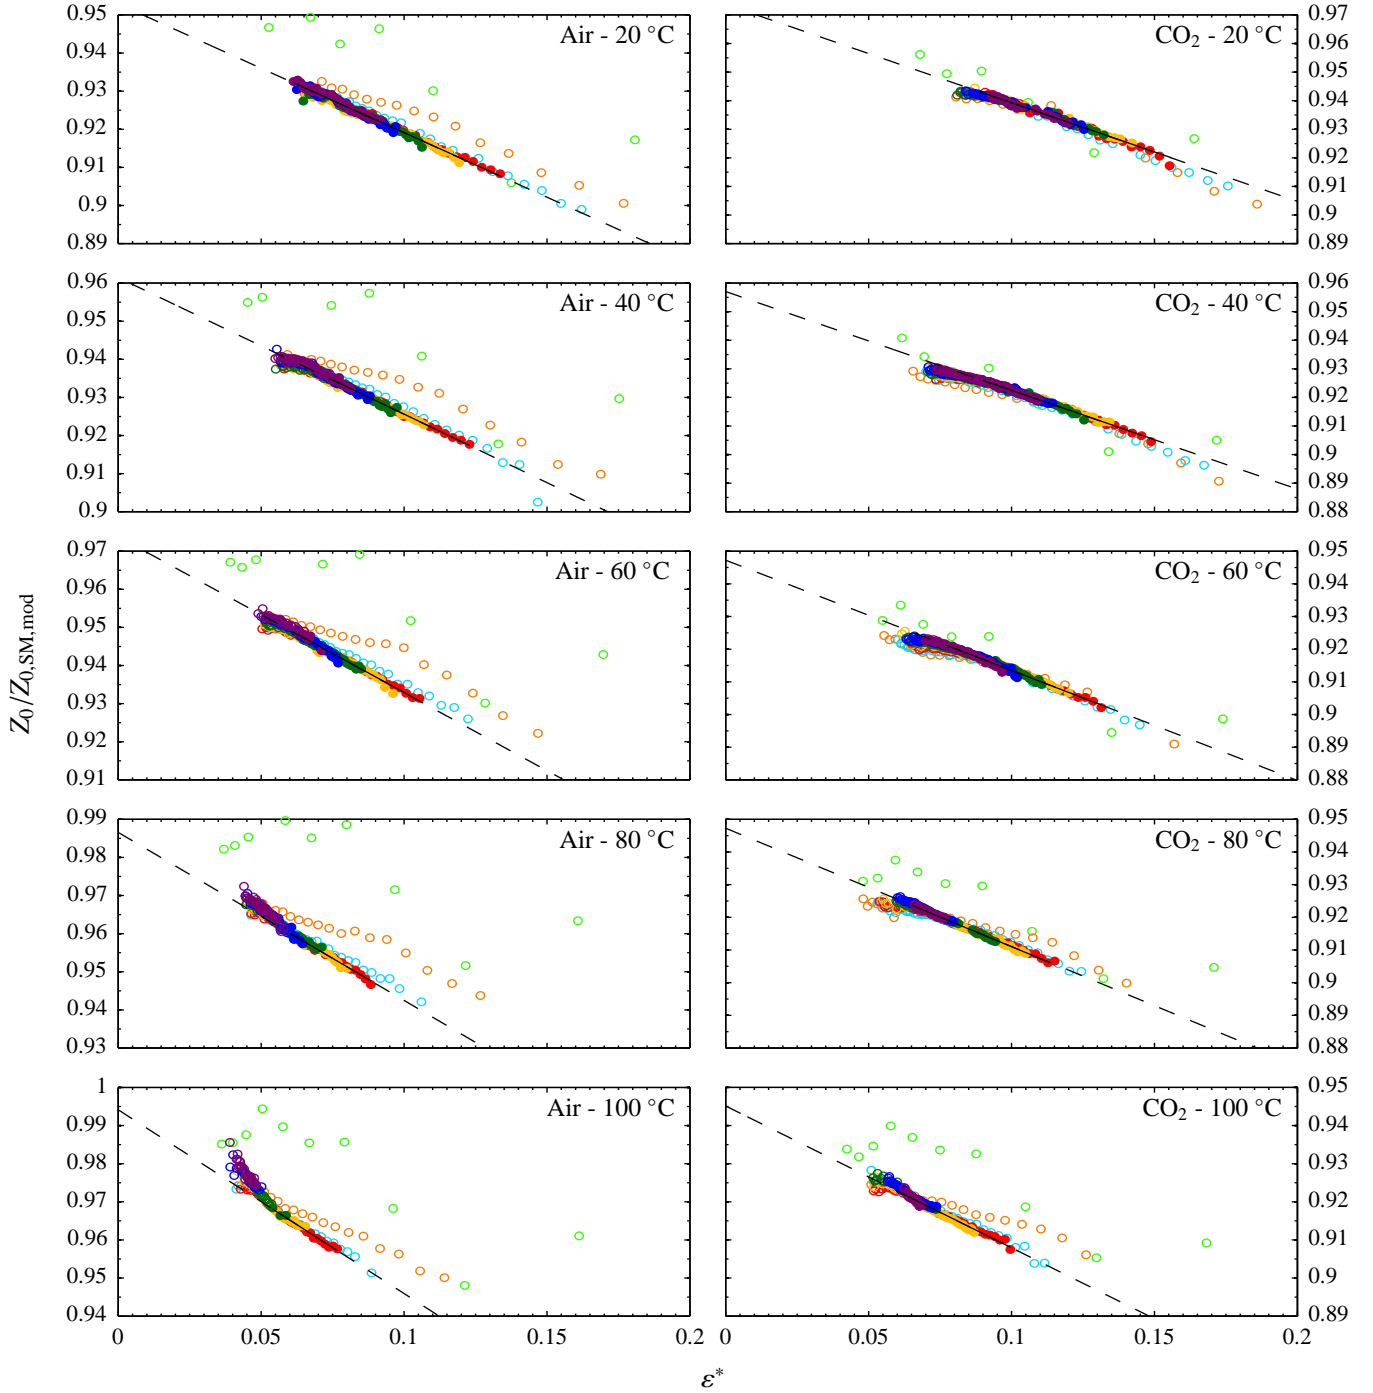

**Figure C4.** Plots of  $Z_0/Z_{0,SM,mod}$  vs.  $\varepsilon^*$  for positively-charged EMI-BF<sub>4</sub> nanodrops (from EMI-BF<sub>4</sub> + THABr spectra) with  $z = 1-8$ , in dry air (left) and CO<sub>2</sub> (right), at temperatures of 20, 40, 60, 80, and 100 °C (increasing from top to bottom), corresponding to the best-collapse  $d_g$  in each case, and best linear fits for nanodrops with  $z = 4-8$  (same colors and symbols as in Figure 5 of the article). The range of  $\varepsilon^*$  over which each sample was fitted, and the associated best-fit  $d_g$ ,  $\beta$ , and  $\xi$ , are listed in Table 2 of the article

## References

1. Taguchi, R.; Machida, H.; Sato, Y.; Smith Jr., R. L. *J. Chem. Eng. Data* **2009**, *54*, 22–27.
2. Fernández-García, J.; Fernández de la Mora, J. *J. Am. Soc. Mass Spectrom.* **2013**, *24*, 1872–1889.
3. Viidanoja, J.; Sysoev, A.; Adamov, A.; Kotiaho, T. *Rapid Commun. Mass Spectrom.* **2005**, *19*, 3051–3055.
4. Eiceman, G. A.; Nazarov, E. G.; Stone, J. A. *Anal. Chim. Acta* **2003**, *493*, 185–194.
